# Supplementary material for: How Machine Learning Will Revolutionize Electrochemical Sciences
Source: PubMed Central journal article supplement — ACS Energy Lett. 2021 Mar 23;6(4):1422–31. doi: 10.1021/acsenergylett.1c00194 (PMC8042659; doi:10.1021/acsenergylett.1c00194), 2021-03-23
Supplement: nz1c00194_si_001.pdf [file nz1c00194_si_001.pdf]

# Supporting Information

## How Machine Learning Will Revolutionize Electrochemical Sciences

Aashutosh Mistry,<sup>\*,†</sup> Alejandro A. Franco,<sup>\*,‡</sup> Samuel J. Cooper,<sup>\*,⊥</sup> Scott A. Roberts,<sup>\*,#</sup> and Venkatasubramanian Viswanathan<sup>\*,@</sup>

<sup>†</sup>*Chemical Sciences and Engineering Division, Argonne National Laboratory, Lemont, Illinois 60439, United States*

<sup>‡</sup>*Laboratoire de Réactivité et Chimie des Solides (LRCS), UMR CNRS 7314, Université de Picardie Jules Verne, Hub de l'Energie, 15 rue Baudelocque, 80039 Amiens Cedex, France*

<sup>¶</sup>*Réseau sur le Stockage Electrochimique de l'Energie (RS2E), FR CNRS 3459, Hub de l'Energie, 15 rue Baudelocque, 80039 Amiens Cedex, France*

<sup>§</sup>*ALISTORE-European Research Institute, FR CNRS 3104, Hub de l'Energie, 15 rue Baudelocque, 80039 Amiens Cedex, France*

<sup>||</sup>*Institut Universitaire de France, 103 Boulevard Saint Michel, 75005 Paris, France*

<sup>⊥</sup>*Dyson School of Design Engineering, Imperial College London, London SW7 2DB, United Kingdom*

<sup>#</sup>*Engineering Sciences Center, Sandia National Laboratories, Albuquerque, New Mexico 87185, United States*

<sup>@</sup>*Department of Mechanical Engineering, Carnegie Mellon University, Pittsburgh, Pennsylvania 15213, United States*

E-mail: amistry@anl.gov; alejandro.franco@u-picardie.fr; samuel.cooper@imperial.ac.uk;  
sarober@sandia.gov; venkvis@cmu.edu

# Model Parameters and Data Accuracy

As mentioned in the manuscript, data-driven ML models fundamentally approximate the trends underlying the dataset. Often data contains variability (*e.g.*, noise in measurements) and instead of each datapoint considered as an accurate representation of system behavior, the datapoints are treated collectively to infer the mean trends. In other words, the choice of ML model is related to the trends a researcher wishes to infer. This process is guided by researcher's intuition, experience and quantitative descriptors of model fidelity. The model selection process can be broken down into two aspects:

- Type of approximation, for example, neural networks *vs.* gaussian process regression;
- Parameters in the approximation, for example, how many hidden layers and how many neurons in each hidden layer in a neural network approximation.

The first aspect is largely governed by intuition and experience. In the context of physics-based ML, the physics provides additional information such as continuity and differentiability of the approximation - in the  $D = D(T)$  example in Fig 2, the slope  $d \log D / d(1/T)$  is related to activation energy and has a physical meaning.

The second aspect of identifying parameters has relatively straightforward quantitative guidelines, and is referred to as Bias-Variance Trade-off or Cross-validation.<sup>1</sup> The idea is to split the dataset into (at least) two subsets - one for training and another for testing. Once the model type is fixed (say neural network), number of model parameters is assumed, the model is subsequently trained for these many parameters and the predictions of the trained model are compared against the testing set. This process is repeated for multiple parameter counts to construct (i) training error vs. # parameters and (ii) testing error vs. # parameters plots. The training error improves with parameter counts and usually exhibits a monotonic dependence. Alternatively, the test error improves initially, plateaus and starts diverging at higher degrees of parameterization. Accordingly, the optimal approximation is the one with the smallest train and test error. Some recent studies<sup>2</sup> demonstrate that the test error

model  $(x - x_0)^2 + (y - y_0)^2 = r^2$   
 parameters  $x_0, y_0, r$

• datapoints  $(\hat{x}, \hat{y})$   
 — underlying trend

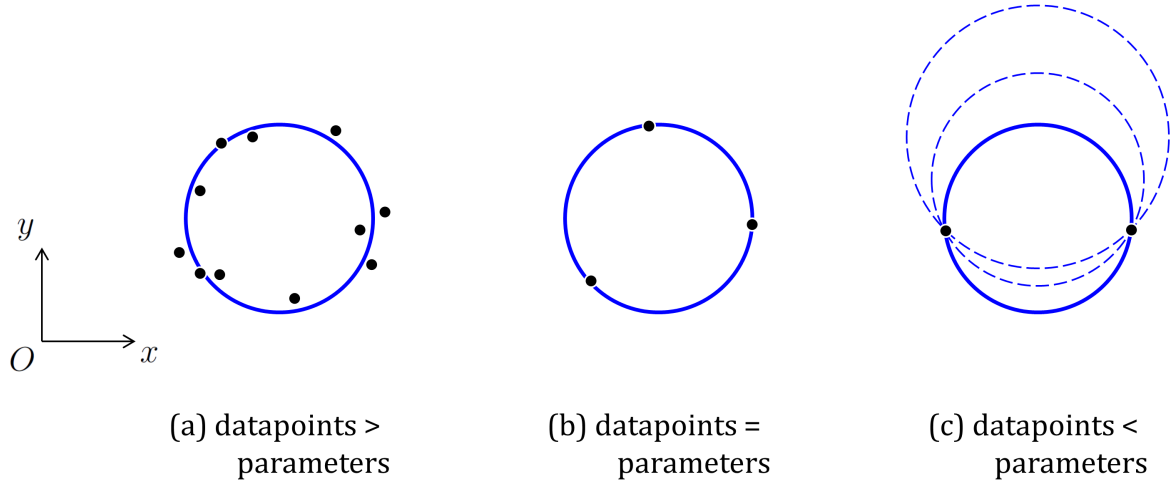

Figure S1: For a given dataset, three approximations are possible based on the degree of parameterization. (a) Regression deals with more datapoints than the parameters, while (b), (c) interpolation has as many parameters or more. Implicitly, these categories relate to the reliability of the datasets.

has a more involved relationship with the degree of parameterization. Instead of a diverging test error at higher parameterization, it increases and then decreases again (referred to as the *double descent* phenomenon) to provide superior predictions. Thus, one should explore a sufficient range of parameterization to identify an optimal approximation. If the optimal approximation chosen based on such error landscapes exhibits large errors, one can modify other details of the approximation. For the neural network example, one can try different activation functions or the input features and output labels may be preprocessed (sometimes referred to feature engineering) to improve predictability. Each such design choice will lead to a new set of error landscapes to help identify corresponding optimal approximation.

An upper bound on the degree of parameterization is set by the datapoints in the training set. For an  $N$  datapoints set ( $N$  points for every input feature), at most  $N$  parameters can be uniquely identified. One has to provide additional information to identify extra parameters. To pictorially illustrate this, let us consider identifying a circle  $(x - x_0)^2 + (y - y_0)^2 = r^2$  from given dataset  $(\hat{x}, \hat{y})$ .

This model has three parameters  $(x_0, y_0, r)$ , and require three linearly independent datapoints to uniquely identify these parameters (Fig S1(b)). If less datapoints are available, additional information is needed to find a unique parameter set. For example, multiple circles, *i.e.*, different  $(x_0, y_0, r)$ , pass through two datapoints. Additional information that identifies a relationship among parameters is needed to find a unique set. In this example (Fig S1(c)) a circle passing through the two points and having the smallest radius,  $r$ , is unique. In the other extreme, when too many datapoints are available (Fig S1(a)), a unique parameter set can be identified in the least squares sense. Let  $(x_i, y_i)$  be the underlying trend at the datapoint  $(\hat{x}_i, \hat{y}_i)$ . A unique parameter set exists that minimizes the error

$$E = \sum_i (\hat{x}_i - x_0)^2 + (\hat{y}_i - y_0)^2 - r^2$$

Classically, Fig S1(a) is a regression problem, while Fig S1(b-c) are interpolations.<sup>3,4</sup> Fundamentally, the choice of regression vs. interpolation relates to the reliability of the data. If the datapoints contain variability, the underlying trends should be identified using regression; while if the datapoints represent true system response, interpolation is a logical approach. Most non-scientific ML implementations build on field data and accordingly perform regression. However, the physics-based ML deals with high confidence datasets such as generated from a physics-based simulation and allows us to explore interpolation (e.g., Fig 5). End of the day, one must treat experimentally generated data (*e.g.*, cell performance), physics-based stochastic calculations (*e.g.*, monte carlo) and physics-based deterministic simulations (*e.g.*, porous electrode theory) as different datasets with intrinsically different reliability levels.

## ML Applications - an Extended List

Besides good Machine Learning (ML) textbooks,<sup>1,5-8</sup> the following list provides references to different ML applications. Given the nascent state of ML applied to scientific fields, not all examples are from the electrochemical systems.<sup>9,10</sup> We also include interesting examples

from other fields that have potential application to the electrochemical systems.

**Structure - property mappings** <sup>11-41</sup>

**Mesostructure Generation** <sup>42-52</sup>

**Property - performance mappings** <sup>53-64</sup>

**Control and Automation** <sup>65-72</sup>

**Miscellaneous** <sup>61,73-91</sup>

## References

- (1) Bishop, C. M. *Pattern Recognition and Machine Learning*; springer, 2006.
- (2) Nakkiran, P.; Kaplun, G.; Bansal, Y.; Yang, T.; Barak, B.; Sutskever, I. Deep double descent: Where bigger models and more data hurt. *arXiv preprint arXiv:1912.02292* **2019**,
- (3) Ma, S.; Bassily, R.; Belkin, M. The Power of Interpolation: Understanding the Effectiveness of SGD in Modern Over-parametrized Learning. Stockholmsmässan, Stockholm Sweden, 2018; pp 3325-3334.
- (4) Berrada, L.; Zisserman, A.; Kumar, M. P. Training Neural Networks for and by Interpolation. 2020.
- (5) Murphy, K. P. *Machine learning: a probabilistic perspective*; MIT press, 2012.
- (6) Goodfellow, I.; Bengio, Y.; Courville, A. *Deep learning*; MIT press, 2016.
- (7) Friedman, J.; Hastie, T.; Tibshirani, R. *The elements of statistical learning*; Springer series in statistics New York, 2001; Vol. 1.
- (8) Abu-Mostafa, Y.; Lin, H.; Magdon-Ismail, M. *Learning from data: a short course*; 2012.

- (9) Baker, N.; Alexander, F.; Bremer, T.; Hagberg, A.; Kevrekidis, Y.; Najm, H.; Parashar, M.; Patra, A.; Sethian, J.; Wild, S.; Willcox, K.; Lee, S. Workshop Report on Basic Research Needs for Scientific Machine Learning: Core Technologies for Artificial Intelligence. **2019**,
- (10) Stevens, R.; Taylor, V.; Nichols, J.; MacCabe, A. B.; Yelick, K.; Brown, D. AI for Science. 2020; <https://www.anl.gov/ai-for-science-report>, [Online; accessed: Sep 06, 2020].
- (11) Allahyari, Z.; Oganov, A. R. Coevolutionary search for optimal materials in the space of all possible compounds. *npj Computational Materials* **2020**, *6*, 1–10.
- (12) Alshehri, A. S.; Gani, R.; You, F. Deep Learning and Knowledge-Based Methods for Computer-Aided Molecular Design — Toward a Unified Approach: State-of-the-Art and Future Directions. *Computers & Chemical Engineering* **2020**, 107005.
- (13) Sanchez-Lengeling, B.; Aspuru-Guzik, A. Inverse molecular design using machine learning: Generative models for matter engineering. *Science* **2018**, *361*, 360–365.
- (14) Ahmad, Z.; Xie, T.; Maheshwari, C.; Grossman, J. C.; Viswanathan, V. Machine Learning Enabled Computational Screening of Inorganic Solid Electrolytes for Suppression of Dendrite Formation in Lithium Metal Anodes. *ACS Central Science* **2018**, *4*, 996–1006.
- (15) Doan, H. A.; Agarwal, G.; Qian, H.; Counihan, M. J.; Rodríguez-López, J.; Moore, J. S.; Assary, R. S. Quantum Chemistry-Informed Active Learning to Accelerate the Design and Discovery of Sustainable Energy Storage Materials. *Chemistry of Materials* **2020**, *32*, 6338–6346.
- (16) Zhang, L.; He, B.; Zhao, Q.; Zou, Z.; Chi, S.; Mi, P.; Ye, A.; Li, Y.; Wang, D.; Avdeev, M.; Adams, S.; Shi, S. A Database of Ionic Transport Characteristics for Over 29 000 Inorganic Compounds. *Advanced Functional Materials* **2020**, *30*, 2003087.

- (17) Qiao, B.; Mohapatra, S.; Lopez, J.; Leverick, G. M.; Tatara, R.; Shibuya, Y.; Jiang, Y.; France-Lanord, A.; Grossman, J. C.; Gómez-Bombarelli, R.; Johnson, J. A.; Shao-Horn, Y. Quantitative Mapping of Molecular Substituents to Macroscopic Properties Enables Predictive Design of Oligoethylene Glycol-Based Lithium Electrolytes. *ACS Central Science* **2020**, *6*, 1115–1128.
- (18) Houchins, G.; Viswanathan, V. Towards Ultra Low Cobalt Cathodes: A High Fidelity Computational Phase Search of Layered Li-Ni-Mn-Co Oxides. *Journal of The Electrochemical Society* **2020**, *167*, 070506.
- (19) Houchins, G.; Krishnamurthy, D.; Viswanathan, V. The role of uncertainty quantification and propagation in accelerating the discovery of electrochemical functional materials. *MRS Bulletin* **2019**, *44*, 204–212.
- (20) Yuan, Y.; Houchins, G.; Guan, P.-W.; Viswanathan, V. Uncertainty Quantification of First Principles Computational Phase Diagram Predictions of Li-Si System Via Bayesian Sampling. 2020.
- (21) Houchins, G.; Viswanathan, V. Towards Ultra Low Cobalt Cathodes: A High Fidelity Computational Phase Search of Layered Li-Ni-Mn-Co Oxides. *J. Electrochem. Soc.* **2020**, *167*, 070506.
- (22) Vandermause, J.; Torrisi, S. B.; Batzner, S.; Xie, Y.; Sun, L.; Kolpak, A. M.; Kozinsky, B. On-the-fly active learning of interpretable Bayesian force fields for atomistic rare events. *npj Computational Materials* **2020**, *6*, 1–11.
- (23) Zuo, Y.; Chen, C.; Li, X.; Deng, Z.; Chen, Y.; Behler, J.; Csányi, G.; Shapeev, A. V.; Thompson, A. P.; Wood, M. A., et al. Performance and cost assessment of machine learning interatomic potentials. *J. Phys. Chem. A* **2020**, *124*, 731–745.
- (24) Shao, Y.; Hellström, M.; Mitev, P. D.; Knijff, L.; Zhang, C. PiNN: A Python Library

- for Building Atomic Neural Networks of Molecules and Materials. *J. Chem. Inf. Model.* **2020**,
- (25) Xie, T.; France-Lanord, A.; Wang, Y.; Shao-Horn, Y.; Grossman, J. C. Graph dynamical networks for unsupervised learning of atomic scale dynamics in materials. *Nature communications* **2019**, *10*, 1–9.
- (26) Kahle, L.; Musaelian, A.; Marzari, N.; Kozinsky, B. Unsupervised landmark analysis for jump detection in molecular dynamics simulations. *Phys. Rev. Materials* **2019**, *3*, 055404.
- (27) Molinari, N.; Xie, Y.; Leifer, I.; Kornbluth, M.; Kozinsky, B. Spectral denoising for unsupervised analysis of correlated ionic transport. 2020.
- (28) Ceriotti, M. Unsupervised machine learning in atomistic simulations, between predictions and understanding. *J. Chem. Phys.* **2019**, *150*, 150901.
- (29) Zhou, T.; Brown, M.; Snavely, N.; Lowe, D. G. Unsupervised Learning of Depth and Ego-Motion from Video. 2017 IEEE Conference on Computer Vision and Pattern Recognition (CVPR). 2017; pp 6612–6619.
- (30) Brunton, S. L.; Proctor, J. L.; Kutz, J. N. Discovering governing equations from data by sparse identification of nonlinear dynamical systems. *Proceedings of the National Academy of Sciences* **2016**, *113*, 3932–3937.
- (31) Mistry, A. N.; Smith, K.; Mukherjee, P. P. Secondary-Phase Stochastics in Lithium-Ion Battery Electrodes. *ACS Applied Materials & Interfaces* **2018**, *10*, 6317–6326.
- (32) Mistry, A.; Mukherjee, P. P. Precipitation–Microstructure Interactions in the Li-Sulfur Battery Electrode. *The Journal of Physical Chemistry C* **2017**, *121*, 26256–26264.
- (33) Mistry, A. N.; Cano-Banda, F.; Law, D.; Hernandez-Guerrero, A.; Mukherjee, P. P.



- Non-equilibrium thermodynamics in electrochemical complexation of Li–oxygen porous electrodes. *J. Mater. Chem. A* **2019**, *7*, 8882–8888.
- (34) Cheng, L.; Assary, R. S.; Qu, X.; Jain, A.; Ong, S. P.; Rajput, N. N.; Persson, K.; Curtiss, L. A. Accelerating Electrolyte Discovery for Energy Storage with High-Throughput Screening. *The Journal of Physical Chemistry Letters* **2015**, *6*, 283–291.
- (35) Gu, G. H.; Noh, J.; Kim, I.; Jung, Y. Machine learning for renewable energy materials. *J. Mater. Chem. A* **2019**, *7*, 17096–17117.
- (36) Sendek, A. D.; Yang, Q.; Cubuk, E. D.; Duerloo, K.-A. N.; Cui, Y.; Reed, E. J. Holistic computational structure screening of more than 12000 candidates for solid lithium-ion conductor materials. *Energy Environ. Sci.* **2017**, *10*, 306–320.
- (37) Jäger, M. O.; Morooka, E. V.; Canova, F. F.; Himanen, L.; Foster, A. S. Machine learning hydrogen adsorption on nanoclusters through structural descriptors. *npj Computational Materials* **2018**, *4*, 1–8.
- (38) Kajita, S.; Ohba, N.; Suzumura, A.; Tajima, S.; Asahi, R. Discovery of superionic conductors by ensemble-scope descriptor. *NPG Asia Materials* **2020**, *12*, 1–8.
- (39) Gómez-Bombarelli, R.; Wei, J. N.; Duvenaud, D.; Hernández-Lobato, J. M.; Sánchez-Lengeling, B.; Sheberla, D.; Aguilera-Iparraguirre, J.; Hirzel, T. D.; Adams, R. P.; Aspuru-Guzik, A. Automatic Chemical Design Using a Data-Driven Continuous Representation of Molecules. *ACS Central Science* **2018**, *4*, 268–276.
- (40) Ko, T. W.; Finkler, J. A.; Goedecker, S.; Behler, J. General-Purpose Machine Learning Potentials Capturing Nonlocal Charge Transfer. *Accounts of Chemical Research* **2021**, *54*, 808–817, PMID: 33513012.
- (41) Hsu, Y.-C.; Yu, C.-H.; Buehler, M. J. Tuning Mechanical Properties in Polycrys-

- talline Solids Using a Deep Generative Framework. *Advanced Engineering Materials* *n/a*, 2001339.
- (42) Gayon-Lombardo, A.; Mosser, L.; Brandon, N. P.; Cooper, S. J. Pores for thought: generative adversarial networks for stochastic reconstruction of 3D multi-phase electrode microstructures with periodic boundaries. *npj Computational Materials* **2020**, *6*, 1–11.
- (43) Hsu, T.; Epting, W. K.; Kim, H.; Abernathy, H. W.; Hackett, G. A.; Rollett, A. D.; Salvador, P. A.; Holm, E. A. Microstructure Generation via Generative Adversarial Network for Heterogeneous, Topologically Complex 3D Materials. 2020.
- (44) Ge, M.; Su, F.; Zhao, Z.; Su, D. Deep Learning Analysis on Microscopic Imaging in Materials Science. *Materials Today Nano* **2020**, 100087.
- (45) Jiang, Z.; Li, J.; Yang, Y.; Mu, L.; Wei, C.; Yu, X.; Pianetta, P.; Zhao, K.; Cloetens, P.; Lin, F.; Liu, Y. Machine-learning-revealed statistics of the particle-carbon/binder detachment in lithium-ion battery cathodes. *Nature Communications* **2020**, *11*, [article id: 2310].
- (46) Norris, C.; Mukherjee, P. P.; Roberts, S. A. Structural Uncertainty Analysis on Graphite Electrodes Using Convolutional Neural Networks. 2021; *in preparation*.
- (47) Krygier, M. C.; Norris, C.; LaBonte, T.; Martinez, C.; Collins, L. N.; Roberts, S. A. Impact of geometric uncertainty in 3D image data on physical properties. 2021; *in preparation*.
- (48) LaBonte, T.; Martinez, C.; Roberts, S. A. We Know Where We Don't Know: 3D Bayesian CNNs for Credible Geometric Uncertainty. arXiv: 1910.10793.
- (49) Madireddy, S.; Chung, D.-W.; Loeffler, T.; Sankaranarayanan, S. K.; Seidman, D. N.; Balaprakash, P.; Heinonen, O. Phase Segmentation in Atom-Probe Tomography Using Deep Learning-Based Edge Detection. *Scientific reports* **2019**, *9*, 1–10.

- (50) Du, M.; Nashed, Y. S. G.; Kandel, S.; Gürsoy, D.; Jacobsen, C. Three dimensions, two microscopes, one code: Automatic differentiation for x-ray nanotomography beyond the depth of focus limit. *Science Advances* **2020**, *6*.
- (51) Joshi, A.; Cho, M.; Shah, V.; Pokuri, B. S. S.; Sarkar, S.; Ganapathysubramanian, B.; Hegde, C. InvNet: Encoding Geometric and Statistical Invariances in Deep Generative Models. AAI. 2020; pp 4377–4384.
- (52) Yang, K.; Cao, Y.; Zhang, Y.; Tang, M.; Aberg, D.; Sadigh, B.; Zhou, F. Self-Supervised Learning and Prediction of Microstructure Evolution with Recurrent Neural Networks. 2020.
- (53) Zhang, Y.; Tang, Q.; Zhang, Y.; Wang, J.; Stimming, U.; Lee, A. A. Identifying degradation patterns of lithium ion batteries from impedance spectroscopy using machine learning. *Nature communications* **2020**, *11*, 1–6.
- (54) Ng, M.-F.; Zhao, J.; Yan, Q.; Conduit, G. J.; Seh, Z. W. Predicting the state of charge and health of batteries using data-driven machine learning. *Nature Machine Intelligence* **2020**, 1–10.
- (55) Kriston, A.; Podias, A.; Adanouj, I.; Pfrang, A. Analysis of the Effect of Thermal Runaway Initiation Conditions on the Severity of Thermal Runaway—Numerical Simulation and Machine Learning Study. *Journal of The Electrochemical Society* **2020**, *167*, 090555.
- (56) Dubarry, M.; Beck, D. Big data training data for artificial intelligence-based Li-ion diagnosis and prognosis. *Journal of Power Sources* **2020**, *479*, 228806.
- (57) Fermín-Cueto, P.; McTurk, E.; Allerhand, M.; Medina-Lopez, E.; Anjos, M. F.; Sylvester, J.; dos Reis, G. Identification and machine learning prediction of knee-point and knee-onset in capacity degradation curves of lithium-ion cells. *Energy and AI* **2020**, *1*, 100006.

- (58) Gao, T.; Lu, W. Physical Model and Machine Learning Enabled Electrolyte Channel Design for Fast Charging. *Journal of The Electrochemical Society* **2020**, *167*, 110519.
- (59) Mistry, A.; Trask, S.; Dunlop, A.; Jeka, G.; Polzin, B.; Mukherjee, P. P.; Srinivasan, V. Quantifying Negative Effects of Carbon-binder Networks from Electrochemical Performance of Porous Li-ion Electrodes. **2021**, [unpublished].
- (60) Lombardo, T.; Hooek, J.-B.; Primo, E. N.; Ngandjong, A. C.; Duquesnoy, M.; Franco, A. A. Accelerated Optimization Methods for Force-Field Parametrization in Battery Electrode Manufacturing Modeling. *Batteries & Supercaps* **2020**, *3*, 721–730.
- (61) Raissi, M.; Yazdani, A.; Karniadakis, G. E. Hidden fluid mechanics: Learning velocity and pressure fields from flow visualizations. *Science* **2020**,
- (62) Duquesnoy, M.; Lombardo, T.; Chouchane, M.; Primo, E. N.; Franco, A. A. Data-driven assessment of electrode calendaring process by combining experimental results, in silico mesostructures generation and machine learning. *Journal of Power Sources* **2020**, *480*, 229103.
- (63) Hall, E. J.; Taverniers, S.; Katsoulakis, M. A.; Tartakovsky, D. M. GINNs: Graph-Informed Neural Networks for Multiscale Physics. 2020.
- (64) Tenny, K.; Braatz, R.; Chiang, Y.-M.; Brushett, F. Leveraging Neural Networks and Genetic Algorithms to Refine Electrode Properties in Redox Flow Batteries. **2021**,
- (65) MacLeod, B. P. et al. Self-driving laboratory for accelerated discovery of thin-film materials. *Science Advances* **2020**, *6*, [article id: eaaz8867].
- (66) Dave, A.; Mitchell, J.; Kandasamy, K.; Burke, S.; Paria, B.; Poczos, B.; Whitacre, J.; Viswanathan, V. Autonomous discovery of battery electrolytes with robotic experimentation and machine-learning. 2019.

- (67) Whitacre, J. F.; Mitchell, J.; Dave, A.; Wu, W.; Burke, S.; Viswanathan, V. An Autonomous Electrochemical Test Stand for Machine Learning Informed Electrolyte Optimization. *Journal of The Electrochemical Society* **2019**, *166*, A4181–A4187.
- (68) Attia, P. M.; Grover, A.; Jin, N.; Severson, K. A.; Markov, T. M.; Liao, Y.-H.; Chen, M. H.; Cheong, B.; Perkins, N.; Yang, Z., et al. Closed-loop optimization of fast-charging protocols for batteries with machine learning. *Nature* **2020**, *578*, 397–402.
- (69) Severson, K. A.; Attia, P. M.; Jin, N.; Perkins, N.; Jiang, B.; Yang, Z.; Chen, M. H.; Aykol, M.; Herring, P. K.; Fraggedakis, D., et al. Data-driven prediction of battery cycle life before capacity degradation. *Nature Energy* **2019**, *4*, 383–391.
- (70) Cunha, R. P.; Lombardo, T.; Primo, E. N.; Franco, A. A. Artificial Intelligence Investigation of NMC Cathode Manufacturing Parameters Interdependencies. *Batteries & Supercaps* **2020**, *3*, 60–67.
- (71) Mistry, A.; Mukherjee, P. P. Deconstructing electrode pore network to learn transport distortion. *Physics of Fluids* **2019**, *31*, 122005.
- (72) Gasper, P.; Gering, K.; Dufek, E.; Smith, K. Challenging Practices of Algebraic Battery Life Models through Statistical Validation and Model Identification via Machine-Learning. *Journal of the Electrochemical Society* **2021**, *168*, 020502.
- (73) Raissi, M.; Perdikaris, P.; Karniadakis, G. Physics-informed neural networks: A deep learning framework for solving forward and inverse problems involving nonlinear partial differential equations. *Journal of Computational Physics* **2019**, *378*, 686 – 707.
- (74) Chen, R. T.; Rubanova, Y.; Bettencourt, J.; Duvenaud, D. K. Neural ordinary differential equations. *Advances in neural information processing systems*. 2018; pp 6571–6583.

- (75) Bills, A.; Sripad, S.; Fredericks, W. L.; Guttenberg, M.; Charles, D.; Frank, E.; Viswanathan, V. Universal Battery Performance and Degradation Model for Electric Aircraft. 2020.
- (76) Tartakovsky, A. M.; Marrero, C. O.; Perdikaris, P.; Tartakovsky, G. D.; Barajas-Solano, D. Learning Parameters and Constitutive Relationships with Physics Informed Deep Neural Networks. 2018.
- (77) Chen, R. T. Q.; Rubanova, Y.; Bettencourt, J.; Duvenaud, D. Neural Ordinary Differential Equations. 2018.
- (78) Dwivedi, V.; Parashar, N.; Srinivasan, B. Distributed physics informed neural network for data-efficient solution to partial differential equations. 2019.
- (79) Botelho, S.; Joshi, A.; Khara, B.; Sarkar, S.; Hegde, C.; Adavani, S.; Ganapathysubramanian, B. Deep Generative Models that Solve PDEs: Distributed Computing for Training Large Data-Free Models. 2020.
- (80) Han, J.; Jentzen, A.; E, W. Solving high-dimensional partial differential equations using deep learning. *Proceedings of the National Academy of Sciences* **2018**, *115*, 8505–8510.
- (81) Karumuri, S.; Tripathy, R.; Billionis, I.; Panchal, J. Simulator-free solution of high-dimensional stochastic elliptic partial differential equations using deep neural networks. *Journal of Computational Physics* **2020**, *404*, 109120.
- (82) Zhu, Y.; Zabaras, N.; Koutsourelakis, P.-S.; Perdikaris, P. Physics-constrained deep learning for high-dimensional surrogate modeling and uncertainty quantification without labeled data. *Journal of Computational Physics* **2019**, *394*, 56–81.
- (83) Guo, X.; Li, W.; Iorio, F. Convolutional Neural Networks for Steady Flow Approximation. Proceedings of the 22nd ACM SIGKDD International Conference on Knowledge Discovery and Data Mining. New York, NY, USA, 2016; p 481–490.

- (84) Li, L.; Kim, H. A. Multiscale Topology Optimization of Thermoelastic Structures Using the Level Set Method. *AIAA Scitech 2020 Forum* [DOI: 10.2514/6.2020-0890].
- (85) Wang, Q.; Jackson, J. A.; Ge, Q.; Hopkins, J. B.; Spadaccini, C. M.; Fang, N. X. Lightweight Mechanical Metamaterials with Tunable Negative Thermal Expansion. *Phys. Rev. Lett.* **2016**, *117*, 175901.
- (86) Aguirre, N. et al. Whitepaper: IPAM Program "Complex Energy Landscapes" (fall 2017). 2018.
- (87) Pollice, R.; dos Passos Gomes, G.; Aldeghi, M.; Hickman, R. J.; Krenn, M.; Lavigne, C.; Lindner-D'Addario, M.; Nigam, A.; Ser, C. T.; Yao, Z.; Aspuru-Guzik, A. Data-Driven Strategies for Accelerated Materials Design. *Accounts of Chemical Research* **2021**, *54*, 849–860, PMID: 33528245.
- (88) Qian, G.; Zhang, J.; Chu, S.-Q.; Li, J.; Zhang, K.; Yuan, Q.; Ma, Z.-F.; Pianetta, P.; Li, L.; Jung, K.; Liu, Y. Understanding the Mesoscale Degradation in Nickel-Rich Cathode Materials through Machine-Learning-Revealed Strain–Redox Decoupling. *ACS Energy Letters* **2021**, *6*, 687–693.
- (89) Guo, K.; Yang, Z.; Yu, C.-H.; Buehler, M. J. Artificial intelligence and machine learning in design of mechanical materials. *Mater. Horiz.* **2021**, –.
- (90) Tao, Q.; Xu, P.; Li, M.; Lu, W. Machine learning for perovskite materials design and discovery. *npj Computational Materials* **2021**, *7*, 1–18.
- (91) Iten, R.; Metger, T.; Wilming, H.; del Rio, L.; Renner, R. Discovering Physical Concepts with Neural Networks. *Phys. Rev. Lett.* **2020**, *124*, 010508.
